# Supplementary material for: Heat Shock Protein 20 Gene Superfamilies in Red Algae: Evolutionary and Functional Diversities
Source: Front Plant Sci. 2022 Mar 16;13:817852. doi: 10.3389/fpls.2022.817852 (PMC8966773; doi:10.3389/fpls.2022.817852)
Supplement: Supplementary file 4 [file Table_4.XLSX]

## Sheet: Table S4
Supplementary Table 4. List of 97 Hsp20 genes identified in red algae and their sequence characteristics
Name	Accession number	Chr	Genomic Location	Introns	Animo Acids	MW（kDa)	pI	Instability index	Species	Class
CymHsp20-20.6	XP_005534842.1	NC_010136.1	295042-295575	0	177	20.5772	5.59	56.83	Cyanidioschyzon merolae	Cyanidiophyceae
CymHsp20-27.1	XP_005534843.1	NC_010136.1	295921-296640	0	239	27.064	9.7	64.22	Cyanidioschyzon merolae	Cyanidiophyceae
GasHsp20-18.0	XP_005702890.1	NW_005178408.1	25746-26430	0	157	17.9944	5.82	42.57	Galdieria sulphuraria	Cyanidiophyceae
GasHsp20-23.0	XP_005707918.1	NW_005178467.1	109726-110570	0	198	23.0264	8.83	54.84	Galdieria sulphuraria	Cyanidiophyceae
GasHsp20-20.4	XP_005707806.1	NW_005178466.1	183374-184114	0	179	20.4118	5.6	49.91	Galdieria sulphuraria	Cyanidiophyceae
CacHsp20-26.2	ctg_466.g243	N/A	N/A	N/A	232	26.2184	9.63	60.99	Cyanidium caldarium	Cyanidiophyceae
CacHsp20-13.4	ctg_466.g245	N/A	N/A	N/A	117	13.4213	6.1	41.63	Cyanidium caldarium	Cyanidiophyceae
ChcHsp20-17.9	XP_005715945.1	NW_005179112.1	121412-121943	0	162	17.9274	7.07	73.59	Chondrus crispus	Florideophyceae
ChcHsp20-16.5	XP_005710587.1	NW_005178579.1	76558-77293	1	153	16.5108	7.92	53.81	Chondrus crispus	Florideophyceae
ChcHsp20-18.6	XP_005710585.1	NW_005178579.1	73627-74650	0	167	18.6369	5.24	44.65	Chondrus crispus	Florideophyceae
ChcHsp20-18.7a	XP_005710590.1	NW_005178579.1	83537-84217	0	168	18.703	5.61	37.69	Chondrus crispus	Florideophyceae
ChcHsp20-18.7b	XP_005713022.1	NW_005178987.1	126698-127198	0	166	18.673	6.06	37.33	Chondrus crispus	Florideophyceae
GrcHsp20-16.7	PXF48856.1	NBIV01000011.1	448669-449106	0	145	16.658	9.36	31.4	Gracilariopsis chorda	Florideophyceae
GrcHsp20-19.1	PXF48861.1	NBIV01000011.1	462835-463335	0	166	19.0513	6.38	46.15	Gracilariopsis chorda	Florideophyceae
GrcHsp20-18.5a	PXF43131.1	NBIV01000136.1	139126-139623	0	165	18.5237	5.7	35.73	Gracilariopsis chorda	Florideophyceae
GrcHsp20-18.5b	PXF45332.1	NBIV01000063.1	240984-241481	0	165	18.5237	5.7	35.73	Gracilariopsis chorda	Florideophyceae
GrcHsp20-19.0	PXF48858.1	NBIV01000011.1	454168-454671	0	167	19.0095	5.6	48.64	Gracilariopsis chorda	Florideophyceae
GrcHsp20-17.4	PXF48860.1	NBIV01000011.1	460830-461291	0	153	17.4256	7.79	48.47	Gracilariopsis chorda	Florideophyceae
AcHsp20-27.3	GEZJ01004084.1	N/A	N/A	N/A	247	27.313	4.88	43.14	Agarophyton chilense	Florideophyceae
AcHsp20-22.7	GEZJ01006567.1	N/A	N/A	N/A	208	22.6925	4.73	42.81	Agarophyton chilense	Florideophyceae
AcHsp20-12.9	GEZJ01010286.1	N/A	N/A	N/A	121	12.9421	3.97	44.44	Agarophyton chilense	Florideophyceae
AcHsp20-14.7	GEZJ01000271.1	N/A	N/A	N/A	132	14.7026	6.59	25.84	Agarophyton chilense	Florideophyceae
AcHsp20-14.9	GEZJ01010753.1	N/A	N/A	N/A	135	14.8695	5.15	45.5	Agarophyton chilense	Florideophyceae
AcHsp20-13.8	GEZJ01010526.1	N/A	N/A	N/A	125	13.8476	6.29	21.76	Agarophyton chilense	Florideophyceae
AcHsp20-17.6	GEZJ01000906.1	N/A	N/A	N/A	157	17.614	5.46	35.02	Agarophyton chilense	Florideophyceae
AcHsp20-21.7	GEZJ01007007.1	N/A	N/A	N/A	195	21.7241	4.59	55.12	Agarophyton chilense	Florideophyceae
AcHsp20-13.0	GEZJ01008127.1	N/A	N/A	N/A	116	13.0175	5.74	26.33	Agarophyton chilense	Florideophyceae
MeHsp20-13.4	CAMPEP_0198329610	N/A	N/A	N/A	123	13.4183	5.28	38.96	Madagascaria erythrocladioides	Compsopogonophyceae
MeHsp20-21.4	CAMPEP_0198325328	N/A	N/A	N/A	194	21.4243	5.74	51.56	Madagascaria erythrocladioides	Compsopogonophyceae
MeHsp20-24.8	CAMPEP_0198323184	N/A	N/A	N/A	225	24.7824	10.14	45.5	Madagascaria erythrocladioides	Compsopogonophyceae
MeHsp20-18.6	CAMPEP_0198332838	N/A	N/A	N/A	167	18.5998	4.89	35.9	Madagascaria erythrocladioides	Compsopogonophyceae
MeHsp20-18.5	CAMPEP_0198322028	N/A	N/A	N/A	163	18.4627	5.61	45.71	Madagascaria erythrocladioides	Compsopogonophyceae
MeHsp20-19.6	CAMPEP_0198308332	N/A	N/A	N/A	172	19.6345	9.59	53.17	Madagascaria erythrocladioides	Compsopogonophyceae
MeHsp20-19.7	CAMPEP_0198370546	N/A	N/A	N/A	175	19.6922	5.59	55.23	Madagascaria erythrocladioides	Compsopogonophyceae
CocHsp20-21.6	CAMPEP_0184678794	N/A	N/A	N/A	194	21.6088	6.19	42.82	Compsopogon caeruleus	Compsopogonophyceae
CocHsp20-13.6	CAMPEP_0184689562	N/A	N/A	N/A	122	13.5711	6.3	41.93	Compsopogon caeruleus	Compsopogonophyceae
CocHsp20-17.5	CAMPEP_0184684952	N/A	N/A	N/A	154	17.5086	5.38	46.49	Compsopogon caeruleus	Compsopogonophyceae
CocHsp20-19.6	CAMPEP_0184678182	N/A	N/A	N/A	175	19.647	6.24	42.58	Compsopogon caeruleus	Compsopogonophyceae
CocHsp20-22.2	CAMPEP_0184685346	N/A	N/A	N/A	195	22.1893	6.87	58.29	Compsopogon caeruleus	Compsopogonophyceae
CocHsp20-18.5	CAMPEP_0184688626	N/A	N/A	N/A	171	18.4641	6.93	46.98	Compsopogon caeruleus	Compsopogonophyceae
CocHsp20-19.1	CAMPEP_0184688652	N/A	N/A	N/A	175	19.0697	5.98	39.22	Compsopogon caeruleus	Compsopogonophyceae
CocHsp20-7.6	CAMPEP_0184677568	N/A	N/A	N/A	69	7.55989	9.4	25.16	Compsopogon caeruleus	Compsopogonophyceae
EaHsp20-26.5	CAMPEP_0185834268	N/A	N/A	N/A	239	26.5287	8.61	53.6	Erythrolobus australicus	Porphyridiophyceae
EaHsp20-30.4	CAMPEP_0185831210	N/A	N/A	N/A	276	30.4376	7.77	61.71	Erythrolobus australicus	Porphyridiophyceae
EaHsp20-25.9	CAMPEP_0185832030	N/A	N/A	N/A	231	25.8778	9.73	61.69	Erythrolobus australicus	Porphyridiophyceae
PoaHsp20-15.8	CAMPEP_0184695396	N/A	N/A	N/A	138	15.7521	5.94	41.98	Porphyridium aerugineum	Porphyridiophyceae
PoaHsp20-15.6a	CAMPEP_0184695058	N/A	N/A	N/A	139	15.5698	6.74	44.31	Porphyridium aerugineum	Porphyridiophyceae
PoaHsp20-26.9	CAMPEP_0184706748	N/A	N/A	N/A	237	26.8977	6.1	50.66	Porphyridium aerugineum	Porphyridiophyceae
PoaHsp20-15.5	CAMPEP_0184692014	N/A	N/A	N/A	138	15.4846	5.2	42.46	Porphyridium aerugineum	Porphyridiophyceae
PoaHsp20-15.6b	CAMPEP_0184695184	N/A	N/A	N/A	137	15.5856	5.22	61.81	Porphyridium aerugineum	Porphyridiophyceae
PoaHsp20-49.3	CAMPEP_0184694450	N/A	N/A	N/A	434	49.2742	5.55	62.13	Porphyridium aerugineum	Porphyridiophyceae
PrpHsp20-17.6	KAA8492424.1	VRMN01000009.1	156725-157195	0	156	17.623	5.94	47.47	Porphyridium purpureum	Porphyridiophyceae
PrpHsp20-17.1a	KAA8495217.1	VRMN01000003.1	43739-44206	0	155	17.0664	4.98	41.19	Porphyridium purpureum	Porphyridiophyceae
PrpHsp20-17.1b	KAA8498095.1	VRMN01000001.1	1422179-1422646	0	155	17.0664	4.98	41.19	Porphyridium purpureum	Porphyridiophyceae
PrpHsp20-22.1	KAA8490456.1	VRMN01000027.1	49240-49842	0	200	22.0591	9.24	46.7	Porphyridium purpureum	Porphyridiophyceae
PrpHsp20-22.0	KAA8495218.1	VRMN01000003.1	44982-45584	0	200	22.0311	9.34	47.3	Porphyridium purpureum	Porphyridiophyceae
PrpHsp20-25.2a	KAA8490455.1	VRMN01000027.1	48075-48764	0	229	25.2439	8.96	57.17	Porphyridium purpureum	Porphyridiophyceae
PrpHsp20-25.2b	KAA8495219.1	VRMN01000003.1	46060-46749	0	229	25.2288	7.82	57.95	Porphyridium purpureum	Porphyridiophyceae
PrpHsp20-37.4	KAA8493148.1	VRMN01000007.1	115255-116366	1	343	37.4018	9.51	45.93	Porphyridium purpureum	Porphyridiophyceae
PyyHsp20-19.6	py02384.t1	PY_1	5133665-5134204	0	179	19.6288	7.07	32.49	Pyropia yezoensis	Bangiophyceae
PyyHsp20-20.3	py09904.t1	PY_1	23457669-23458271	0	200	20.2966	5.93	42.76	Pyropia yezoensis	Bangiophyceae
PyyHsp20-25.9	py04518.t1	PY_2	2174702-2175442	0	246	25.8802	8.96	31.84	Pyropia yezoensis	Bangiophyceae
PyyHsp20-19.2	py08669.t1	PY_2	3131764-3132282	0	172	19.2194	5.43	53.17	Pyropia yezoensis	Bangiophyceae
PyyHsp20-19.3	py10585.t1	PY_2	9957374-9957892	0	172	19.3075	5.25	61.14	Pyropia yezoensis	Bangiophyceae
PyyHsp20-37.4	pyi00792.t1	PY_3	19588852-19589949	0	365	37.4147	8.36	52.02	Pyropia yezoensis	Bangiophyceae
PyyHsp20-37.6	py04674.t1	PY_3	19805875-19806921	0	348	37.6126	10.88	50.59	Pyropia yezoensis	Bangiophyceae
PphHsp20-25.9	ph07457.t1	Contig391	742923-744512	0	248	25.8862	6.34	47.13	Pyropia haitanensis	Bangiophyceae
PphHsp20-19.2a	ph07461.t1	Contig391	760442-760969	0	175	19.1862	5.67	40.76	Pyropia haitanensis	Bangiophyceae
PphHsp20-19.2b	ph07459.t1	Contig391	746376-746903	0	175	19.1853	5.86	41.9	Pyropia haitanensis	Bangiophyceae
PphHsp20-19.1	ph11471.t1	Contig658	100903-101421	0	172	19.0843	5.24	49.44	Pyropia haitanensis	Bangiophyceae
PphHsp20-28.5	ph09479.t1	Contig531	371921-372727	0	268	28.4711	10.1	45.81	Pyropia haitanensis	Bangiophyceae
PphHsp20-15.6	ph03936.t1	Contig228	1017626-1018057	0	143	15.5732	5.62	43.41	Pyropia haitanensis	Bangiophyceae
PphHsp20-20.8	ph02610.t1	Contig137	1591811-1592974	0	207	20.7933	5.5	31.41	Pyropia haitanensis	Bangiophyceae
PphHsp20-31.9	ph00679.t1	Contig35	1761210-1762271	0	309	31.9339	10.49	56.01	Pyropia haitanensis	Bangiophyceae
PhuHsp20-18.8	OSX71144.1	KV919165.1	49307-49825	0	172	18.7588	5.05	60.47	Porphyra umbilicalis	Bangiophyceae
PhuHsp20-19.3	OSX71147.1	KV919165.1	55772- 56656	0	177	19.3175	5.08	67.63	Porphyra umbilicalis	Bangiophyceae
PhuHsp20-24.4	OSX70650.1	KV919227.1	31571-32431	0	242	24.4206	6.16	42.69	Porphyra umbilicalis	Bangiophyceae
PhuHsp20-19.0	OSX74548.1	KV918942.1	5366-6528	0	175	18.9533	5.41	39.94	Porphyra umbilicalis	Bangiophyceae
PhuHsp20-18.9	OSX79903.1	KV918784.1	971-1912	0	175	18.8651	5.24	45.21	Porphyra umbilicalis	Bangiophyceae
PhuHsp20-28.5	OSX69841.1	KV919383.1	9302-10606	0	261	28.4871	7.82	47.56	Porphyra umbilicalis	Bangiophyceae
PhuHsp20-20.1	OSX74826.1	KV918929.1	109211-110077	0	190	20.1209	7.86	51.06	Porphyra umbilicalis	Bangiophyceae
PhuHsp20-20.5	OSX77904.1	KV918824.1	13568-14202	1	202	20.5182	6.1	41.24	Porphyra umbilicalis	Bangiophyceae
PhuHsp20-37.5	OSX74810.1	KV918929.1	289-1999	0	360	37.5051	9.58	64.69	Porphyra umbilicalis	Bangiophyceae
RhvHsp20-21.4	CAMPEP_0174895196	N/A	N/A	N/A	192	21.4399	7.6	37.62	Rhodella violacea	Rhodellophyceae
RhvHsp20-26.8	CAMPEP_0184715324	N/A	N/A	N/A	241	26.7657	7.16	42.17	Rhodella violacea	Rhodellophyceae
RhvHsp20-17.4	CAMPEP_0174886410	N/A	N/A	N/A	156	17.416	5.93	33.32	Rhodella violacea	Rhodellophyceae
RomHsp20-31.6	CAMPEP_0113960408	N/A	N/A	N/A	284	31.611	5.38	34.2	Rhodosorus marinus	Stylonematophyceae
RomHsp20-34.8	CAMPEP_0113955958	N/A	N/A	N/A	312	34.8247	5.86	41.28	Rhodosorus marinus	Stylonematophyceae
RomHsp20-34.0	CAMPEP_0184742900	N/A	N/A	N/A	303	33.9629	7.04	31.58	Rhodosorus marinus	Stylonematophyceae
RomHsp20-20.0	CAMPEP_0113959018	N/A	N/A	N/A	179	19.9816	4.98	47.33	Rhodosorus marinus	Stylonematophyceae
RomHsp20-16.4	CAMPEP_0184738634	N/A	N/A	N/A	144	16.3626	6.52	40.52	Rhodosorus marinus	Stylonematophyceae
RomHsp20-13.4	CAMPEP_0113964910	N/A	N/A	N/A	117	13.4284	8.1	28.08	Rhodosorus marinus	Stylonematophyceae
StHsp20-35.5	CAMPEP_0198726038	N/A	N/A	N/A	325	35.4921	5.55	33.78	Stylonematophyceae sp	Stylonematophyceae
StHsp20-22.5	CAMPEP_0198728348	N/A	N/A	N/A	197	22.4588	6.26	50.2	Stylonematophyceae sp	Stylonematophyceae
StHsp20-23.2	CAMPEP_0198728000	N/A	N/A	N/A	206	23.2428	9.14	52.7	Stylonematophyceae sp	Stylonematophyceae
StHsp20-23.6	CAMPEP_0198731946	N/A	N/A	N/A	208	23.6324	8.86	60.72	Stylonematophyceae sp	Stylonematophyceae
StHsp20-6.6	CAMPEP_0198732500	N/A	N/A	N/A	60	6.61159	4.21	40.06	Stylonematophyceae sp	Stylonematophyceae
Notes:N/A means that data were not available. These data are not available owing to the lack of a relevant reference genome.
