# Supplementary material for: Heat Shock Protein 20 Gene Superfamilies in Red Algae: Evolutionary and Functional Diversities
Source: Front Plant Sci. 2022 Mar 16;13:817852. doi: 10.3389/fpls.2022.817852 (PMC8966773; doi:10.3389/fpls.2022.817852)
Supplement: Supplementary file 5 [file Table_5.XLSX]

## Sheet: Table S5
Supplementary Table 5. The prediction of subcellular localization of the red algal Hsp20s
Name	Subcellular localization	MULocDeep	BUSCA	Yloc	Wolf	CELLO v.2.5	SeqNLS
ChcHsp20-18.6	Cytoplasm	Nucleus	nucleus	cytoplasm	cyto:13,mito_plas:1	Cytoplasmic	absent
ChcHsp20-16.5	Nucleus	Nucleus	nucleus	nucleus	chlo:6,cyto:5,mito:2,nucl:1	Chloroplast	absent
ChcHsp20-18.7a	Nucleus	Nucleus	nucleus	nucleus	cyto:9,nucl:2,chlo:1,plas:1,extr:1	Mitochondrial	absent
ChcHsp20-18.7b	Mitochondrion/Nucleus	Mitochondrion	nucleus	nucleus	pero:7,cyto:4,chlo:1,mito:1,extr:1	Mitochondrial	absent
ChcHsp20-17.9	Mitochondrion/Nucleus	Mitochondrion	nucleus	nucleus	chlo:8,mito:4,nucl:1,cyto:1	Mitochondrial	absent
CymHsp20-20.6	Nucleus	Mitochondrion	nucleus	nucleus	nucl:7,cyto:5,plas:1,extr:1	Cytoplasmic	absent
CymHsp20-27.1	Mitochondrion	Mitochondrion	mitochondrion	chloroplast	chlo:10.5,chlo_mito:7,mito:2.5,nucl:1	Mitochondrial	absent
GasHsp20-20.4	Nucleus	Nucleus	extracellular space	nucleus	nucl:8,cyto:4,chlo:1,extr:1	Nuclear	NLS
GasHsp20-23.0	Plastid	Mitochondrion	nucleus	chloroplast	chlo:5,cyto:5,nucl:3,extr:1	Chloroplast	absent
GasHsp20-18.0	Cytoplasm	Mitochondrion	nucleus	cytoplasm	cyto:8,extr:3,nucl:2,chlo:1	Cytoplasmic	absent
GrcHsp20-16.7	Mitochondrion	Mitochondrion	nucleus	chloroplast	cyto:13,nucl:1	Mitochondrial	absent
GrcHsp20-19.1	Nucleus	Mitochondrion	nucleus	nucleus	nucl:6,extr:3,cyto:2,chlo:1,cysk:1,golg:1	Nuclear	absent
GrcHsp20-18.5a	Nucleus/Cytoplasm	Mitochondrion	nucleus	cytoplasm	cyto:9,nucl:4,extr:1	Nuclear	absent
GrcHsp20-18.5b	Nucleus/Cytoplasm	Mitochondrion	nucleus	cytoplasm	cyto:9,nucl:4,extr:1	Nuclear	absent
GrcHsp20-19.0	Nucleus	Nucleus	nucleus	nucleus	cyto:7.5,cyto_E.R.:4.5,nucl:4,extr:2	Nuclear	absent
GrcHsp20-17.4	Nucleus	Mitochondrion	nucleus	nucleus	nucl:6,cyto:3,mito:3,pero:2	Nuclear	absent
PrpHsp20-17.6	Nucleus	Mitochondrion	nucleus	chloroplast	cyto:8,nucl:2,mito:2,chlo:1,plas:1	Nuclear	absent
PrpHsp20-17.1a	Plastid	Mitochondrion	chloroplast	nucleus	cyto:6,mito:5,chlo:2,nucl:1	Chloroplast	absent
PrpHsp20-17.1b	Plastid	Mitochondrion	chloroplast	nucleus	cyto:6,mito:5,chlo:2,nucl:1	Chloroplast	absent
PrpHsp20-22.1	Mitochondrion	Mitochondrion	mitochondrion	chloroplast	mito:8,chlo:6	Mitochondrial	absent
PrpHsp20-22.0	Mitochondrion	Mitochondrion	chloroplast	chloroplast	mito:9,chlo:5	Mitochondrial	NLS
PrpHsp20-25.2a	Plastid	Plastid	nucleus	chloroplast	chlo:12,nucl:2	Chloroplast	NLS
PrpHsp20-25.2b	Plastid/Nucleus	Plastid	nucleus	chloroplast	nucl:9,cyto:3,mito:1,plas:1	Chloroplast	NLS
PrpHsp20-37.4	Plastid	Mitochondrion	chloroplast	chloroplast	nucl:7,chlo:4,mito:3	Chloroplast	NLS
PhuHsp20-18.8	Nucleus	Mitochondrion	nucleus	nucleus	nucl:6.5,mito:6,nucl_plas:4,chlo:1	Nuclear	absent
PhuHsp20-19.3	Nucleus	Cytoplasm	nucleus	chloroplast	nucl:7,mito:6,cyto:1	Nuclear	absent
PhuHsp20-24.4	Plastid	Mitochondrion	mitochondrion	chloroplast	chlo:14	Chloroplast	absent
PhuHsp20-19.0	Mitochondrion/Nucleus	Nucleus	nucleus	cytoplasm	mito:10,cyto:2,chlo:1,nucl:1	Mitochondrial	absent
PhuHsp20-18.9	Mitochondrion/Nucleus	Nucleus	nucleus	cytoplasm	mito:10,cyto:2,chlo:1,nucl:1	Mitochondrial	absent
PhuHsp20-28.5	Plastid	Plastid	chloroplast	chloroplast	nucl:8,chlo:4,mito:1,plas:1	Nuclear	absent
PhuHsp20-20.1	Plastid	Mitochondrion	nucleus	chloroplast	chlo:9,cyto:2,nucl:1,mito:1,vacu:1	Cytoplasmic	absent
PhuHsp20-20.5	Nucleus	Plastid	nucleus	chloroplast	nucl:8,cyto:5,chlo:1	Nuclear	NLS
PhuHsp20-37.5	Nucleus	Plastid	chloroplast	nucleus	nucl:10,chlo:2,cyto:1,mito:1	Nuclear	absent
PphHsp20-25.9	Plastid	Plastid	mitochondrion	chloroplast	chlo:14	Chloroplast	absent
PphHsp20-19.2a	Plastid/Nucleus	Plastid	nucleus	chloroplast	nucl:11,chlo:2,cyto:1	Cytoplasmic	absent
PphHsp20-19.2b	Plastid/Nucleus	Plastid	nucleus	chloroplast	nucl:11,chlo:2,cyto:1	Cytoplasmic	absent
PphHsp20-19.1	Nucleus	Nucleus	nucleus	chloroplast	pero:11,nucl:2.5,cyto_nucl:2	Nuclear	absent
PphHsp20-28.5	Plastid	Mitochondrion	chloroplast outer membrane	chloroplast	chlo:13,mito:1	Mitochondrial	absent
PphHsp20-15.6	Cytoplasm	Cytoplasm	nucleus	chloroplast	cyto:7,mito:5,chlo:2	Cytoplasmic	absent
PphHsp20-20.8	Plastid/Cytoplasm	Plastid	chloroplast	nucleus	cyto:5,nucl:4,chlo:2,mito:2,extr:1	Cytoplasmic	absent
PphHsp20-31.9	Plastid/Nucleus	Plastid	chloroplast outer membrane	nucleus	chlo:13,mito:1	Nuclear	NLS
PyyHsp20-25.9	Plastid	Plastid	mitochondrion	chloroplast	chlo:13,mito:1	Chloroplast	absent
PyyHsp20-19.2	Nucleus	Nucleus	nucleus	chloroplast	nucl:10,chlo:1,cyto:1,mito:1,plas:1	Nuclear	absent
PyyHsp20-19.3	Nucleus	Nucleus	nucleus	nucleus	nucl:13,plas:1	Nuclear	absent
PyyHsp20-19.6	Nucleus	Nucleus	nucleus	chloroplast	nucl:7,mito:4,chlo:2,cyto:1	Nuclear	absent
PyyHsp20-37.6	Plastid	Plastid	chloroplast	chloroplast	chlo:5,nucl:4,mito:4,cyto:1	Nuclear	absent
PyyHsp20-20.3	Plastid	Plastid	chloroplast	chloroplast	cyto:8,chlo:2,nucl:2,mito:2	Chloroplast	absent
PyyHsp20-37.4	Plastid	Plastid	mitochondrion	chloroplast	chlo:12,mito:1.5,cyto_mito:1.5	Nuclear	absent
CacHsp20-26.2	Plastid	Mitochondrion	chloroplast outer membrane	chloroplast	chlo:13,vacu:1	Mitochondrial	absent
CacHsp20-13.4	Cytoplasm	Nucleus	nucleus	cytoplasm	cyto:14	Cytoplasmic	absent
AcHsp20-27.3	Cytoplasm	Nucleus	nucleus	cytoplasm	cyto:9,chlo:4,mito:1	Cytoplasmic	absent
AcHsp20-22.7	Mitochondrion/Plastid	Mitochondrion	extracellular space	chloroplast	chlo:13,mito:1	Mitochondrial	absent
AcHsp20-12.9	Nucleus	Nucleus	nucleus	nucleus	chlo:5,extr:5,cyto:3,nucl:1	Chloroplast	absent
AcHsp20-14.7	Nucleus	Nucleus	nucleus	nucleus	cyto:10,pero:2,nucl:1,mito:1	Nuclear	absent
AcHsp20-14.9	Mitochondrion	Mitochondrion	nucleus	secreted pathway	mito:8,cyto:4,nucl:2	Mitochondrial	absent
AcHsp20-13.8	Nucleus	Nucleus	nucleus	cytoplasm	chlo:10,cyto:2,plas:1,pero:1	Nuclear	absent
AcHsp20-17.6	Nucleus/Cytoplasm	Mitochondrion	nucleus	nucleus	cyto:8.5,cyto_nucl:5.5,pero:2,nucl:1.5,E.R.:1,cysk:1	Cytoplasmic	absent
AcHsp20-21.7	Nucleus	Nucleus	nucleus	nucleus	cyto:6.5,cyto_nucl:5.5,nucl:3.5,mito:2,plas:1,extr:1	Nuclear	absent
AcHsp20-13.0	Mitochondrion	Mitochondrion	nucleus	chloroplast	cyto:13,nucl:1	Mitochondrial	absent
MeHsp20-13.4	Cytoplasm	N/A	nucleus	N/A	cyto:12,chlo:2	Cytoplasmic	absent
MeHsp20-21.4	Plastid	N/A	chloroplast	N/A	mito:8,chlo:4,nucl:2	Chloroplast	absent
MeHsp20-24.8	Mitochondrion	Mitochondrion	mitochondrion	chloroplast	mito:13,chlo:1	Mitochondrial	absent
MeHsp20-18.6	Nucleus	Nucleus	nucleus	cytoplasm	nucl:6,cyto:3,chlo:2,mito:2,extr:1	Cytoplasmic	absent
MeHsp20-18.5	Nucleus/Cytoplasm	Nucleus	extracellular space	nucleus	cyto:10,chlo:2,extr:2	Cytoplasmic	absent
MeHsp20-19.6	Nucleus	N/A	nucleus	N/A	chlo:7,nucl:5,cyto:2	Nuclear	NLS
MeHsp20-19.7	Cytoplasm	Nucleus	nucleus	cytoplasm	cyto:10,chlo:1,mito:1,extr:1,pero:1	Cytoplasmic	absent
CocHsp20-21.6	Plastid	Plastid	chloroplast	chloroplast	chlo:9,cyto:2,vacu:2,extr:1	Chloroplast	absent
CocHsp20-13.6	Nucleus	Nucleus	nucleus	mitochondrion	cysk:9,cyto:2,extr:2,golg:1	Cytoplasmic	absent
CocHsp20-17.5	Nucleus/Cytoplasm	Mitochondrion	nucleus	cytoplasm	cyto:8,nucl:4,mito:2	Nuclear	absent
CocHsp20-19.6	Cytoplasm	Mitochondrion	chloroplast	cytoplasm	cyto:11,chlo:1,nucl:1,mito:1	Nuclear	absent
CocHsp20-22.2	Nucleus	Nucleus	nucleus	nucleus	chlo:8,plas:3,nucl:1,cyto:1,mito:1	Nuclear	NLS
CocHsp20-18.5	Nucleus/Cytoplasm/Plastid	N/A	nucleus	N/A	cyto:6,extr:6,chlo:1,golg:1	Chloroplast	absent
CocHsp20-19.1	Plastid	N/A	chloroplast	N/A	chlo:9,vacu:2.5,E.R._vacu:2,mito:1,extr:1	Nuclear	absent
CocHsp20-7.6	Nucleus/Cytoplasm/Mitochondrion	N/A	nucleus	N/A	cyto:8,nucl:2,chlo:1,extr:1,cysk:1,golg:1	Mitochondrial	absent
EaHsp20-26.5	Plastid	N/A	chloroplast outer membrane	N/A	chlo:14	Chloroplast	absent
EaHsp20-30.4	Plastid	Plastid	nucleus	cytoplasm	chlo:11,nucl:2,cyto:1	Chloroplast	absent
EaHsp20-25.9	Mitochondrion	Mitochondrion	mitochondrion	chloroplast	chlo:11,mito:2,nucl:1	Mitochondrial	absent
PoaHsp20-15.8	Cytoplasm	Mitochondrion	nucleus	cytoplasm	cyto:14	Cytoplasmic	absent
PoaHsp20-15.6a	Cytoplasm	Mitochondrion	nucleus	cytoplasm	cyto:13,extr:1	Cytoplasmic	absent
PoaHsp20-26.9	Plastid	Plastid	chloroplast outer membrane	chloroplast	mito:8.5,chlo_mito:7,chlo:4.5,plas:1	Cytoplasmic	absent
PoaHsp20-15.5	Cytoplasm	Mitochondrion	nucleus	cytoplasm	cyto:14	Cytoplasmic	absent
PoaHsp20-15.6b	Nucleus/Cytoplasm	Mitochondrion	nucleus	cytoplasm	cyto:7,cyto_nucl:6.5,nucl:4,chlo:2,mito:1	Nuclear	absent
PoaHsp20-49.3	Nucleus	Plastid	chloroplast	nucleus	nucl:7,chlo:4,cyto:1,mito:1,vacu:1	Nuclear	absent
RhvHsp20-21.4	Plastid	Mitochondrion	mitochondrion	chloroplast	chlo:14	Chloroplast	absent
RhvHsp20-26.8	Plastid	N/A	chloroplast outer membrane	N/A	chlo:7,mito:6.5,cyto_mito:4	Mitochondrial	absent
RhvHsp20-17.4	Cytoplasm	Cytoplasm	nucleus	cytoplasm	cyto:9,extr:4,chlo:1	Cytoplasmic	absent
RomHsp20-31.6	Cytoplasm	N/A	nucleus	N/A	cyto:5,cysk:5,chlo:3,mito:1	Cytoplasmic	absent
RomHsp20-34.8	Plastid	Mitochondrion	nucleus	chloroplast	chlo:5,cyto:4,nucl:2.5,plas:2,cysk_nucl:2	Chloroplast	absent
RomHsp20-34.0	Nucleus/Cytoplasm	Mitochondrion	nucleus	nucleus	cyto:9,mito:3,plas:1,cysk_nucl:1	Cytoplasmic	absent
RomHsp20-20.0	Plastid/Nucleus	Nucleus	nucleus	cytoplasm	chlo:8,mito:4,cyto:2	Chloroplast	absent
RomHsp20-16.4	Mitochondrion	Mitochondrion	chloroplast	mitochondrion	mito:7,chlo:3,nucl:2.5,cyto_nucl:2.5,cyto:1.5	Mitochondrial	absent
RomHsp20-13.4	Mitochondrion	Mitochondrion	mitochondrion	chloroplast	mito:7.5,chlo_mito:6.5,chlo:4.5,nucl:1.5,cyto_nucl:1.5	Mitochondrial	absent
StHsp20-35.5	Cytoplasm	N/A	nucleus	N/A	cyto:6,chlo:4,nucl:2,mito:2	Cytoplasmic	absent
StHsp20-22.5	Plastid	N/A	chloroplast	N/A	chlo:8,mito:6	Nuclear	absent
StHsp20-23.2	Plastid	N/A	chloroplast	N/A	chlo:11,vacu:2,mito:1	Mitochondrial	absent
StHsp20-23.6	Plastid	Mitochondrion	chloroplast	chloroplast	mito:7,nucl:4,chlo:2,cyto:1	Chloroplast	NLS
StHsp20-6.6	Nucleus/Cytoplasm	N/A	extracellular space	N/A	cyto:5,chlo:2,nucl:2,mito:2,extr:2,cysk:1	Nuclear	absent
Notes:N/A means that data were not available. This is because these protein sequences contain a non-standard amino acids 'X'.
